# Supplementary material for: Genomic and Epigenetic Changes Drive Aberrant Skeletal Muscle Differentiation in Rhabdomyosarcoma
Source: MDPI journal article supplement (doi:10.3390/cancers15102823), 2023-05-18
Supplement: s1 [file s1]

**Table S1.** Drugs inducing myogenic differentiation in RMS cells in preclinical studies, which have been examined in early phase clinical trials in children and adolescents.

| Drug                                                 | Cellular target | Mechanism of action      | Clinical trial                       | R2P2                                                                                     | RMS                                          | Possible partner drugs                  |
|------------------------------------------------------|-----------------|--------------------------|--------------------------------------|------------------------------------------------------------------------------------------|----------------------------------------------|-----------------------------------------|
| <b>Trametinib (1)</b>                                | MEK1/2          | MAPK pathway             | NCT02124772 (completed)              | 0,032 mg/kg PO once daily (< 6yo);<br>0,025 mg/kg PO once daily (>= 6yo)                 | n/a                                          | + RAF-I,<br>+ multi-TKI,<br>+ IGFR1-I-i |
| <b>Erlotinib (2)</b>                                 | EGFR            | EGFR pathway             | NCT00418327 (completed)              | 125 mg/m <sup>2</sup> PO once daily                                                      | not included                                 | + irinotecan & vincristine              |
| <b>Tazemetostat (3)</b>                              | EZH2            | PRC2                     | NCT02601937 (completed)              | 520 mg/ m <sup>2</sup> PO once daily                                                     | not included                                 |                                         |
| <b>Vorinostat (4)</b>                                | pan-HDAC        | histone acetylation      | NCT01422499 (completed)              | 230 mg/m <sup>2</sup> PO once daily                                                      | RMS included (n=3; no response) <sup>1</sup> |                                         |
| <b>Vorinostat (5)</b>                                | pan-HDAC        | histone acetylation      | NCT01422499 (completed)              | n/a                                                                                      | STS included (n=1; no response) <sup>1</sup> |                                         |
| <b>Entinostat (6)</b>                                | HDAC1/3         | histone acetylation      | NCT02780804 (completed)              | 4 mg/m <sup>2</sup> IV once weekly                                                       | RMS included (n=1; no response) <sup>1</sup> |                                         |
| <b>Cixutumumab (7)</b>                               | IGF1R           | IGF1R                    | NCT00831844 (completed)              | 9 mg/kg IV weekly                                                                        | RMS included (n=20; 1 PR) <sup>2</sup>       | + trametinib                            |
| <b>Ganitumab (combined w/ dasatinib) (8)</b>         | IGF1R           | IGF1R                    | NCT0304170 (terminated)              | Ganitumab 18 mg/kg IV every 2 weeks, (dasatinib 60 mg/m <sup>2</sup> PO once daily)      | RMS included (n=9; 1 PR/ 1 SR)               |                                         |
| <b>Panobinostat</b>                                  | pan-HDAC        | histone acetylation      | NCT02717455 (active, not recruiting) | n/a                                                                                      | not included                                 |                                         |
| <b>Cabozantinib (9)</b>                              | MET             | P3F downstream signaling | NCT02867592 (active, not recruiting) | 40 mg/m <sup>2</sup> PO once daily                                                       | included <sup>3</sup>                        |                                         |
| <b>AZD1775 (combined w/ irinotecan) <sup>4</sup></b> | WEE1            | Cell cycle               | NCT02095132 (active, not recruiting) | AZD1775 85 mg/m <sup>2</sup> PO days 1-5,<br>irinotecan 90 mg/m <sup>2</sup> PO days 1-5 | included <sup>3</sup>                        | + vincristine                           |

|                    |          |                                  |                                                            |     |     |          |
|--------------------|----------|----------------------------------|------------------------------------------------------------|-----|-----|----------|
| <b>BMS-986158</b>  | BRD4     | RMS CRC                          | NCT03936465<br>(active,<br>recruiting)                     | n/a | n/a | + CDK9-i |
| <b>Erdafitinib</b> | pan-FGFR | FGFR4 (P3F downstream signaling) | NCT04083976<br>NCT03155620<br>(both active,<br>recruiting) | n/a | n/a |          |
| <b>Ponatinib</b>   | Pan-FGFR | FGFR4 (P3F downstream signaling) | NCT03934372<br>(active,<br>recruiting)                     | n/a | n/a |          |

<sup>1</sup> no objective responses in RMS patients observed; <sup>2</sup> ARST043: addition to intensive multi-agent chemotherapy in patients with metastatic RMS feasible; but no clinical benefit; <sup>3</sup> no data on objective responses in patients with RMS available yet; <sup>4</sup> vincristine not administered despite preclinical evidence indicating that vincristine significantly enhanced anti-RMS efficacy of AZD1775 and irinotecan in mice

Abbreviations: R2P2, recommended phase 2 dose; RMS, rhabdomyosarcoma; PO, per os; IV, intravenously; yo, years old; STS, soft-tissue sarcoma; TKI, tyrosine kinase inhibitor; PR, partial response; SD, stable disease.

## References:

1. Bouffet E, Geoerger B, Moertel C, Whitlock JA, Aerts I, Hargrave D, *et al.* Efficacy and Safety of Trametinib Monotherapy or in Combination With Dabrafenib in Pediatric BRAF V600-Mutant Low-Grade Glioma. *J Clin Oncol* **2023**;41:664-74
2. Geoerger B, Hargrave D, Thomas F, Ndiaye A, Frappaz D, Andreiuolo F, *et al.* Innovative Therapies for Children with Cancer pediatric phase I study of erlotinib in brainstem glioma and relapsing/refractory brain tumors. *Neuro Oncol* **2011**;13:109-18
3. Chi SN, Bourdeaut F, Laetsch TW, Fouladi M, Macy ME, Makin G, *et al.* Phase I study of tazemetostat, an enhancer of zeste homolog-2 inhibitor, in pediatric pts with relapsed/refractory integrase interactor 1-negative tumors. *JCO* **2020**;ASCO Annual Meeting/ abstract
4. Fouladi M, Park JR, Stewart CF, Gilbertson RJ, Schaiquevich P, Sun J, *et al.* Pediatric phase I trial and pharmacokinetic study of vorinostat: a Children's Oncology Group phase I consortium report. *J Clin Oncol* **2010**;28:3623-9
5. van Tilburg CM, Milde T, Witt R, Ecker J, Hielscher T, Seitz A, *et al.* Phase I/II intra-patient dose escalation study of vorinostat in children with relapsed solid tumor, lymphoma, or leukemia. *Clin Epigenetics* **2019**;11:188
6. Bukowski A, Chang B, Reid JM, Liu X, Minard CG, Trepel JB, *et al.* A phase 1 study of entinostat in children and adolescents with recurrent or refractory solid tumors, including CNS tumors: Trial ADVL1513, Pediatric Early Phase-Clinical Trial Network (PEP-CTN). *Pediatr Blood Cancer* **2021**;68:e28892
7. Weigel B, Malempati S, Reid JM, Voss SD, Cho SY, Chen HX, *et al.* Phase 2 trial of cixutumumab in children, adolescents, and young adults with refractory solid tumors: a report from the Children's Oncology Group. *Pediatr Blood Cancer* **2014**;61:452-6
8. Akshintala S, Bernstein D, Glod J, Kaplan RN, Shern JF, Yohe ME, *et al.* Results of a phase I trial of ganitumab plus dasatinib in patients with rhabdomyosarcoma (RMS). *JCO* **2022**;ASCO Annual Meeting/ abstract
9. Akshintala S, Widemann BC, Barkauskas DA, Hall D, Reid JM, Voss SD, *et al.* Phase 2 trial of cabozantinib in children and young adults with refractory sarcomas, Wilms tumor, and rare tumors: Children's Oncology Group Study (ADVL1622). . ASCO Annual Meeting/ abstract **2021**
